# Supplementary material for: Detection of avian influenza virus by fluorescent DNA barcode-based immunoassay with sensitivity comparable to PCR
Source: Royal Society of Chemistry journal article supplement (doi:10.1039/b916821b), 2009-12-15
Supplement: b916821b.pdf [file b916821b.pdf]

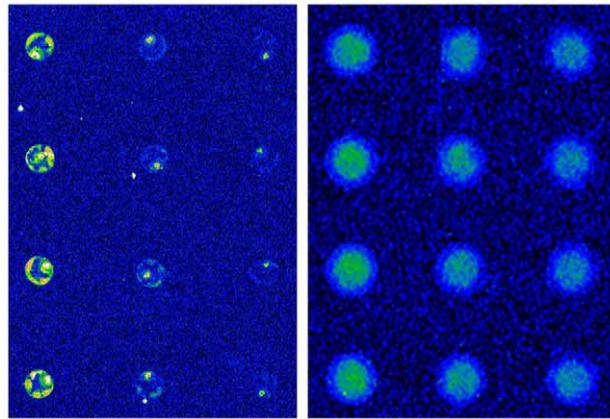

Not dissociated

Dissociated

**Fig. S1.** Compared images before and after dissociating Cy5-biobarcode from the immunocomplexes.

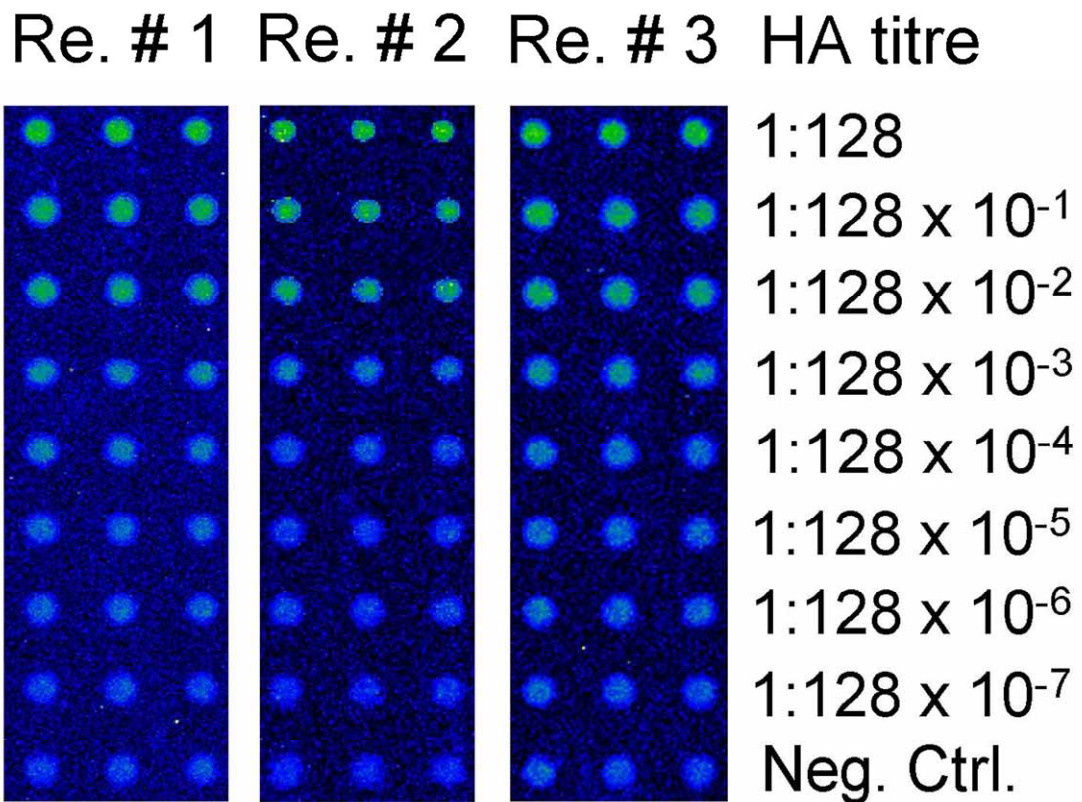

**Fig. S2.** High resolution image of the Cy5-DNA barcode arrays.
